# Supplementary figures and images for: Topochemical build-up of BaTiO3nanorods using BaTi2O5as the template
Source: Royal Society of Chemistry journal article supplement (doi:10.1039/c6ce02504h), 2017-01-01

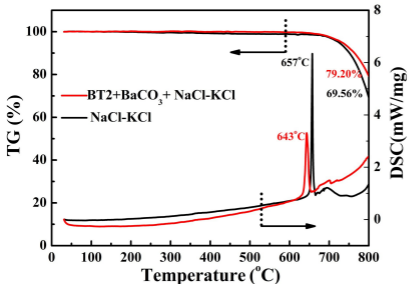

Supplement: c6ce02504h1.pdf [file c6ce02504h1.pdf]

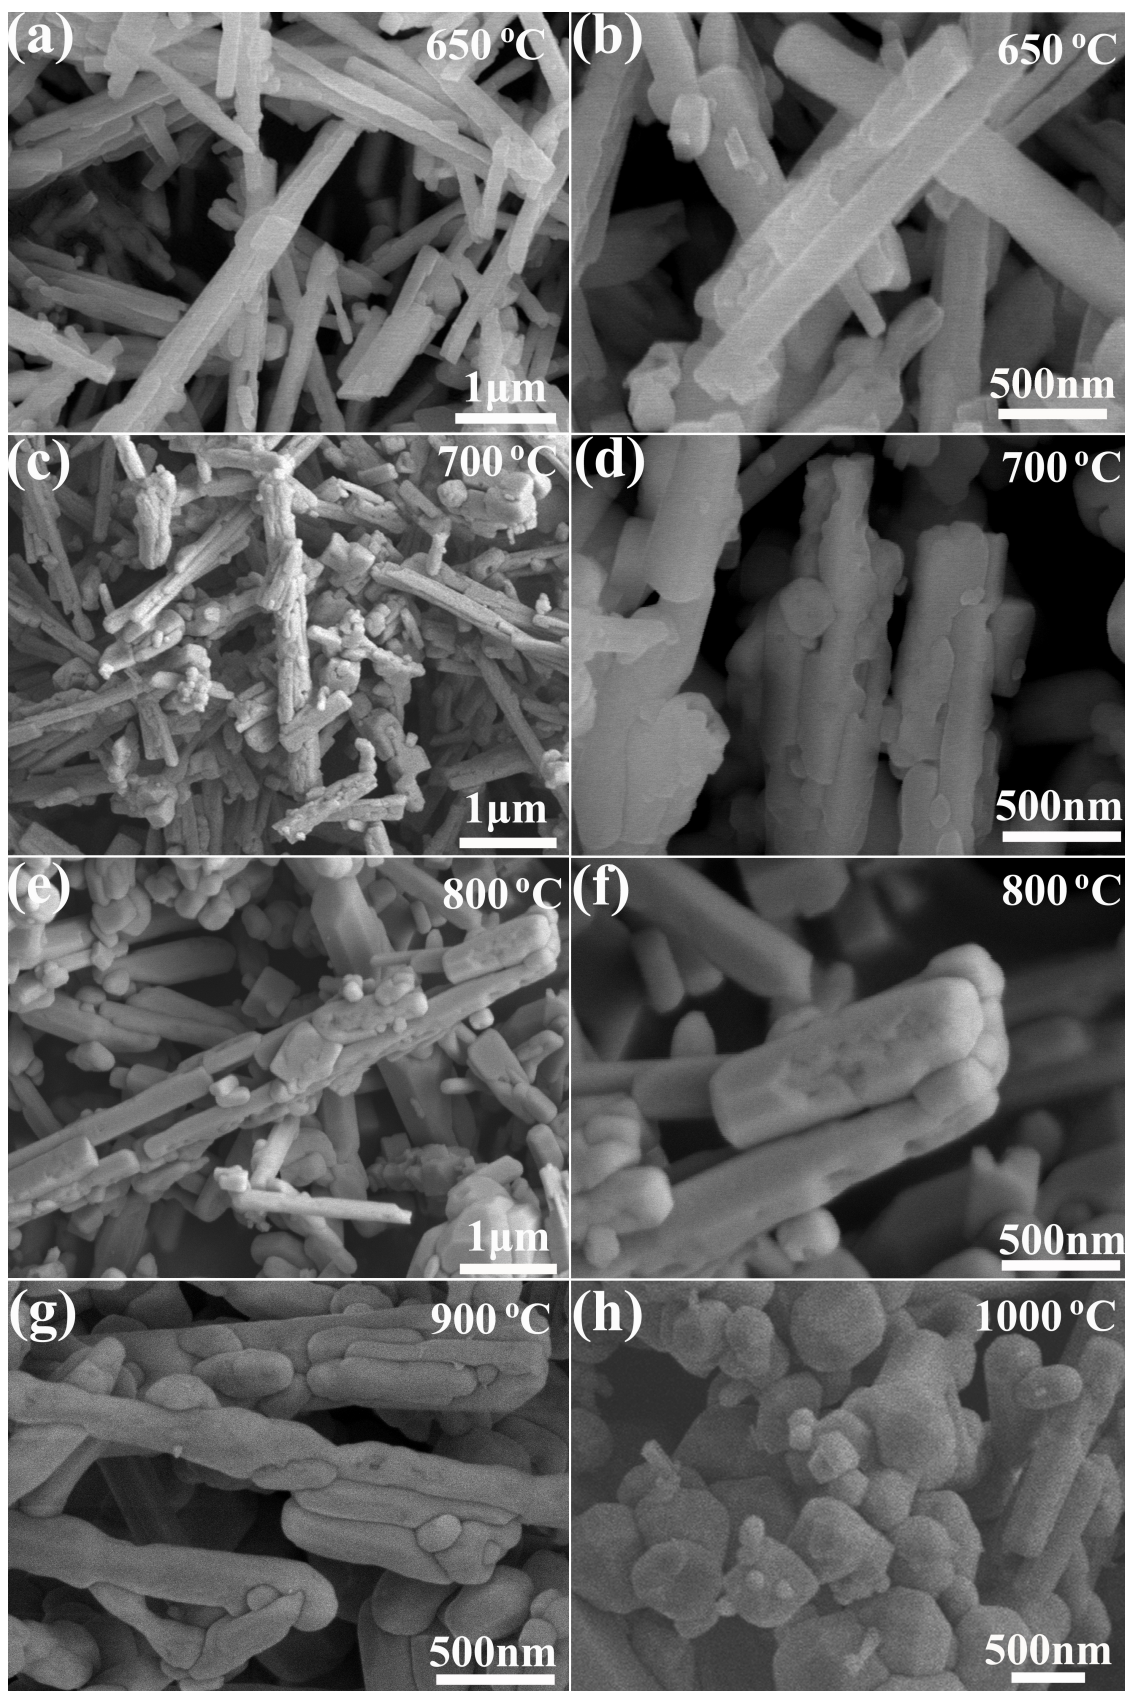

Supplement: c6ce02504h2.pdf [file c6ce02504h2.pdf]
